# Supplementary material
Source: Research Square preprint supplement (doi:10.21203/rs.3.rs-8923565/v1)
Supplement: Supplementary file 1 [file a292679deb6e53714cff3221.docx]

**Supplementary File 1. Appendix**

**Study Measure Adaptations**

Self-Report Altruism Scale

The truncated Self Report Altruism Scale in this study reflects the efficacy of a simplified 9-item scale developed using confirmatory factor analysis. The 9-SRA is adapted from the 20-item scale developed by Rushton et al., and it was shown that the reliability of the 9-SRA (0.77) is very similar to the simulated reliability of the original scale [28], assuming it is reduced to nine items, which is 0.78. This evidence for the reliability of the 9-SRA as a reliable substitute for the original scale while being more appropriate for the context of our questionnaire’s administration was used in the decision to adapt the 9-SRA. In the same study assessing the 9-SRA, factor load was measured with pre and post test analyses, and from this the eight items with the highest predictive load were used in our psychosocial battery [29].

Mental Health-Continuum Short Form (MHC-SF)

Truncation of the MHC-SF reflects a major validation study which laid out factor loading for each of the 14 items and split up correlations by emotional well being, psychological well being, and social well being, as well as a combined general strength [50]. This combined general metric was ultimately used to select for the nine highest strength items, with items excluded all accounting for less than 50% of variance in score.

Brief Resilience Coping

Factor 4 of the BRCS is the least predictive based on a multi analysis study [41] and this remains consistent against most demographic sets that were examined as well as the general population. This item was thereby excluded from our battery for brevity.

New General Self-Efficacy

The 3-item self efficacy scale used in our psychosocial battery reflects a factor analysis done with over 11,000 participants, with the top items measured using factor loading, correlation coefficient, and CITC. After factor analysis, a 4-item Mokken model was shown to have a cumulative variance contribution was 78.68%, lower than the limited value of 80%, while the cumulative variance contribution of the three-item scale with items 2, 5, and 6 was 81.57%, higher than the four-item scale and higher than the limited value of 80% [37]. After integration of the CTT and the Mokken’s test results, this study suggested the short version of the New General Self Efficacy Scale to include these three items, which were then incorporated into our psychosocial battery.

Health-Related Quality of Life and Brief Trauma Questionnaire

These measures were each minorly altered for brevity by combining questions with related content and/or omitting items without relevance to our study.
